# Supplementary material for: Unravelling the sources of uncertainty in glacier runoff projections in the Patagonian Andes (40–56° S)
Source: Copernicus journal article supplement (doi:10.5194/tc-18-5383-2024), 2024-11-21
Supplement: Supplementary file 1 [file tc-18-5383-2024-supplement.pdf]

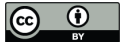

*Supplement of*

## **Unravelling the sources of uncertainty in glacier runoff projections in the Patagonian Andes (40–56° S)**

**Rodrigo Aguayo et al.**

*Correspondence to:* Rodrigo Aguayo (rodaguayo@udec.cl)

The copyright of individual parts of the supplement might differ from the article licence.

**Table S1. Regional surface mass balance models applied in the Patagonian Andes (40–56° S). In parenthesis the initial spatial resolution of the gridded climate. AWS: Automatic weather station. PP: Precipitation. T2M: Air temperature at 2m. GMB: Geodetic mass balance. NPI: Northern Patagonia Icefield. SPI. Southern Patagonia Icefield. GCN: Gran Campo Nevado. CDI: Cordillera Darwin Icefield.**

| Study area | Period    | Reference climate                                    | Downscaling                                                                                                                                     | Target resolution | Timestep | SMB model                  | Calibration/validation of mass balance                                               | Reference                     |
|------------|-----------|------------------------------------------------------|-------------------------------------------------------------------------------------------------------------------------------------------------|-------------------|----------|----------------------------|--------------------------------------------------------------------------------------|-------------------------------|
| NPI        | 1975–2009 | Output from WRF run (5 km) based on NCEP-NCAR (2.5°) | T2M: Constant lapse rate of 6.5 °C km <sup>-1</sup> . PP: Gradient of 0.05% m <sup>-1</sup> . AWSs were used for validation.                    | 450 m             | Daily    | Simplified energy balance  | GMB: Willis et al. (2012) and Rignot et al. (2003)                                   | Schaefer et al. (2013)        |
| GCN        | 2000–2005 | PP: NCEP-NCAR (2.5°). T2M: AWSs                      | T2M: Constant lapse rate of 5.8 °C km <sup>-1</sup> . PP: Gradient of 0.15% m <sup>-1</sup> . Orographic precipitation model as an alternative. | 90 m              | Daily    | Degree-day model           | Ablation stakes for validation                                                       | Weidemann et al. (2013)       |
| NPI + SPI  | 1979–2012 | Output from RACMO run based on ERA-Interim (~80 km)  | No downscaling. AWSs were used for model evaluation                                                                                             | 5.5 km            | 6 hours  | Energy balance (RACMO2.3)  | Ice cores for validation                                                             | Lenaerts et al. (2014)        |
| SPI        | 1975–2011 | Follows Schaefer et al. (2013)                       | Follows Schaefer et al. (2013)                                                                                                                  | 180 m             | Daily    | Simplified energy balance  | Parameters from Schaefer et al. (2013). Ablation stakes and ice cores for validation | Schaefer et al. (2015)        |
| Andes      | 1979–2014 | NASA MERRA (~0.5°)                                   | Downscaling based on MicroMet (Liston and Elder, 2006)                                                                                          | 1 km              | 3 hours  | Energy balance (SnowModel) | SMB observations of seven glaciers (only one in the Patagonian Andes)                | Memild et al. (2017)          |
| NPI + SPI  | 1976–2050 | RegCM4.6 output (10 km) based on MPI-ESM-MR model    | No downscaling. AWSs were used for model evaluation                                                                                             | 10 km             | Daily    | Energy balance             | Validation based on multiple GMBs (NPI and SPI)                                      | Bravo et al. (2021)           |
| NPI + SPI  | 1980–2015 | RegCM4.6 output (10 km) based on ERA-Interim model   | Follows Schaefer et al. (2013). CR2MET was used for validation                                                                                  | 450 m             | 3 hours  | Simplified energy balance  | Calibration based on SMB estimates from Minowa et al. (2021)                         | Carrasco-Escaff et al. (2023) |
| CDI        | 2000–2022 | ERA5 (0.25°) and AWSs                                | Several methods depending on the variable                                                                                                       | 200 m             | 3 hours  | Four different models      | Multiple strategies using ablation stakes, geodetic mass balance and mass budgeting  | Temme et al. (2023)           |
| Andes      | 2000–2019 | Bias-corrected version of TerraClimate (4 km)        | Lapse rates depend on the glaciological zones                                                                                                   | f (glacier area)  | Monthly  | Degree-day model (OGGM)    | GMB from Hugonnet et al. (2021) and volume from Farinotti et al. (2019)              | Caro et al. (2024)            |

10 **Table S2: Selected General Circulation Models (GCMs) of the CMIP6 projects. All GCMs only consider one output (r1i1p1f1). The equilibrium climate sensitivity (ECS) and the transient climate response (TCR) were obtained from Hausfather et al. (2022). Values of Past Performance Index (PPI) for precipitation (PPI<sub>PP</sub>) and temperature (PPI<sub>T2M</sub>) were obtained from Gateño et al. (2024). The selected PPI accounts for seasonal cycles, monthly probabilistic distribution, spatial patterns of climatological means, and the capability of the GCMs to reproduce teleconnection responses (optimal value of 1). The asterisk indicates the GCMs obtained from model screening approach (more details in Gateño et al.).**

| <b>Model</b>  | <b>Resolution<br/>(Lon – Lat)</b> | <b>ECS</b> | <b>TCR</b> | <b>PPI<sub>PP</sub></b> | <b>PPI<sub>T2M</sub></b> |
|---------------|-----------------------------------|------------|------------|-------------------------|--------------------------|
| ACCESS-CM2    | 1.2 – 1.8                         | 4.66       | 1.96       | -0.15                   | 0.42                     |
| BCC-CSM2-MR   | 1.1 – 1.1                         | 3.02       | 1.55       | -0.17                   | 0.63                     |
| CMCC-ESM2     | 1.4 – 1.4                         | 3.58       | 1.92       | 0.02                    | 0.59                     |
| CMCC-CM2-SR5  | 0.9 – 0.9                         | 3.56       | 2.14       | -0.15                   | 0.62                     |
| FGOALS-f3-L*  | 2.3 – 2.3                         | 3.00       | 1.94       | 0.78                    | 0.68                     |
| GFDL-ESM4*    | 1.0 – 1.3                         | 2.65       | 1.63       | 0.78                    | 0.78                     |
| KACE-1-0-G    | 2.2 – 2.2                         | 4.75       | 2.04       | -                       | -                        |
| MIROC6*       | 1.4 – 1.4                         | 2.60       | 1.55       | 0.40                    | 0.57                     |
| MPI-ESM1-2-HR | 0.9 – 0.9                         | 2.98       | 1.64       | 0.24                    | 0.44                     |
| MRI-ESM2-0*   | 1.1 – 1.1                         | 3.13       | 1.67       | 0.79                    | 0.72                     |

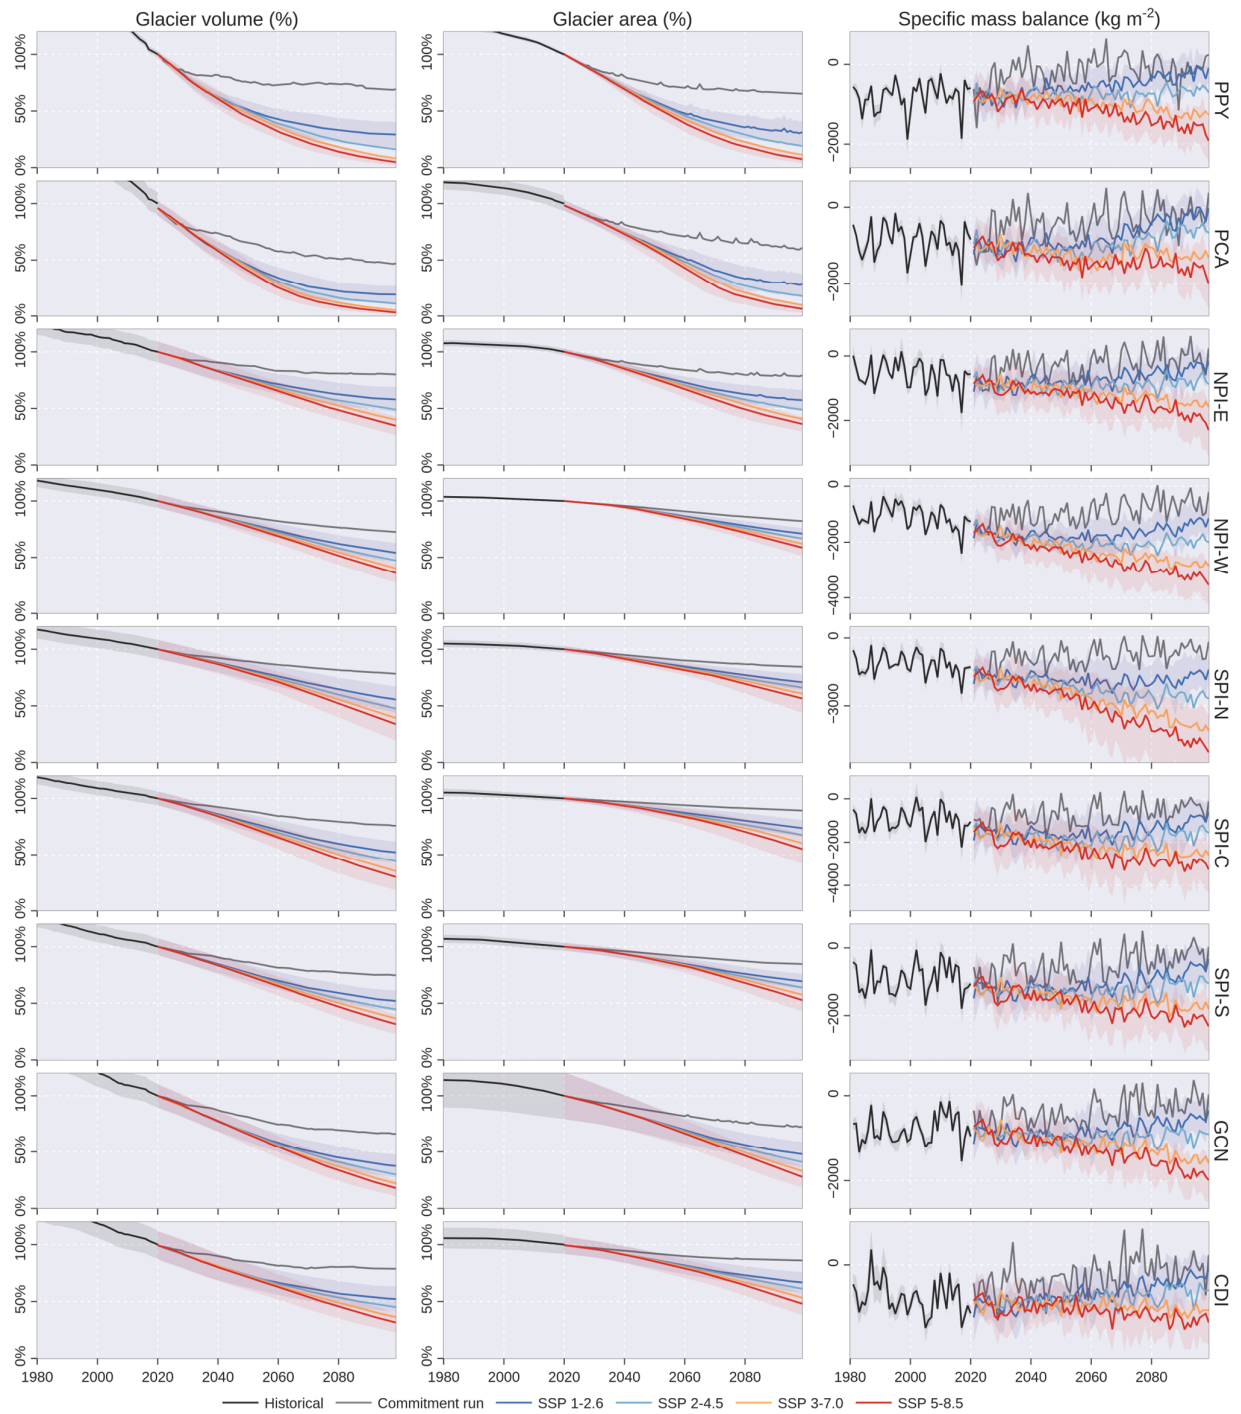

15

**Figure S1. Glacier volume, area, and specific mass balance for each hydrological zone. The solid line represents the mean for each scenario, while the uncertainty bands represent  $\pm$  one standard deviation (shown only for historical, SSP 1-2.6 and SSP 5-8.5 for visualization purposes). Note that each panel of specific mass balance has a different scale.**

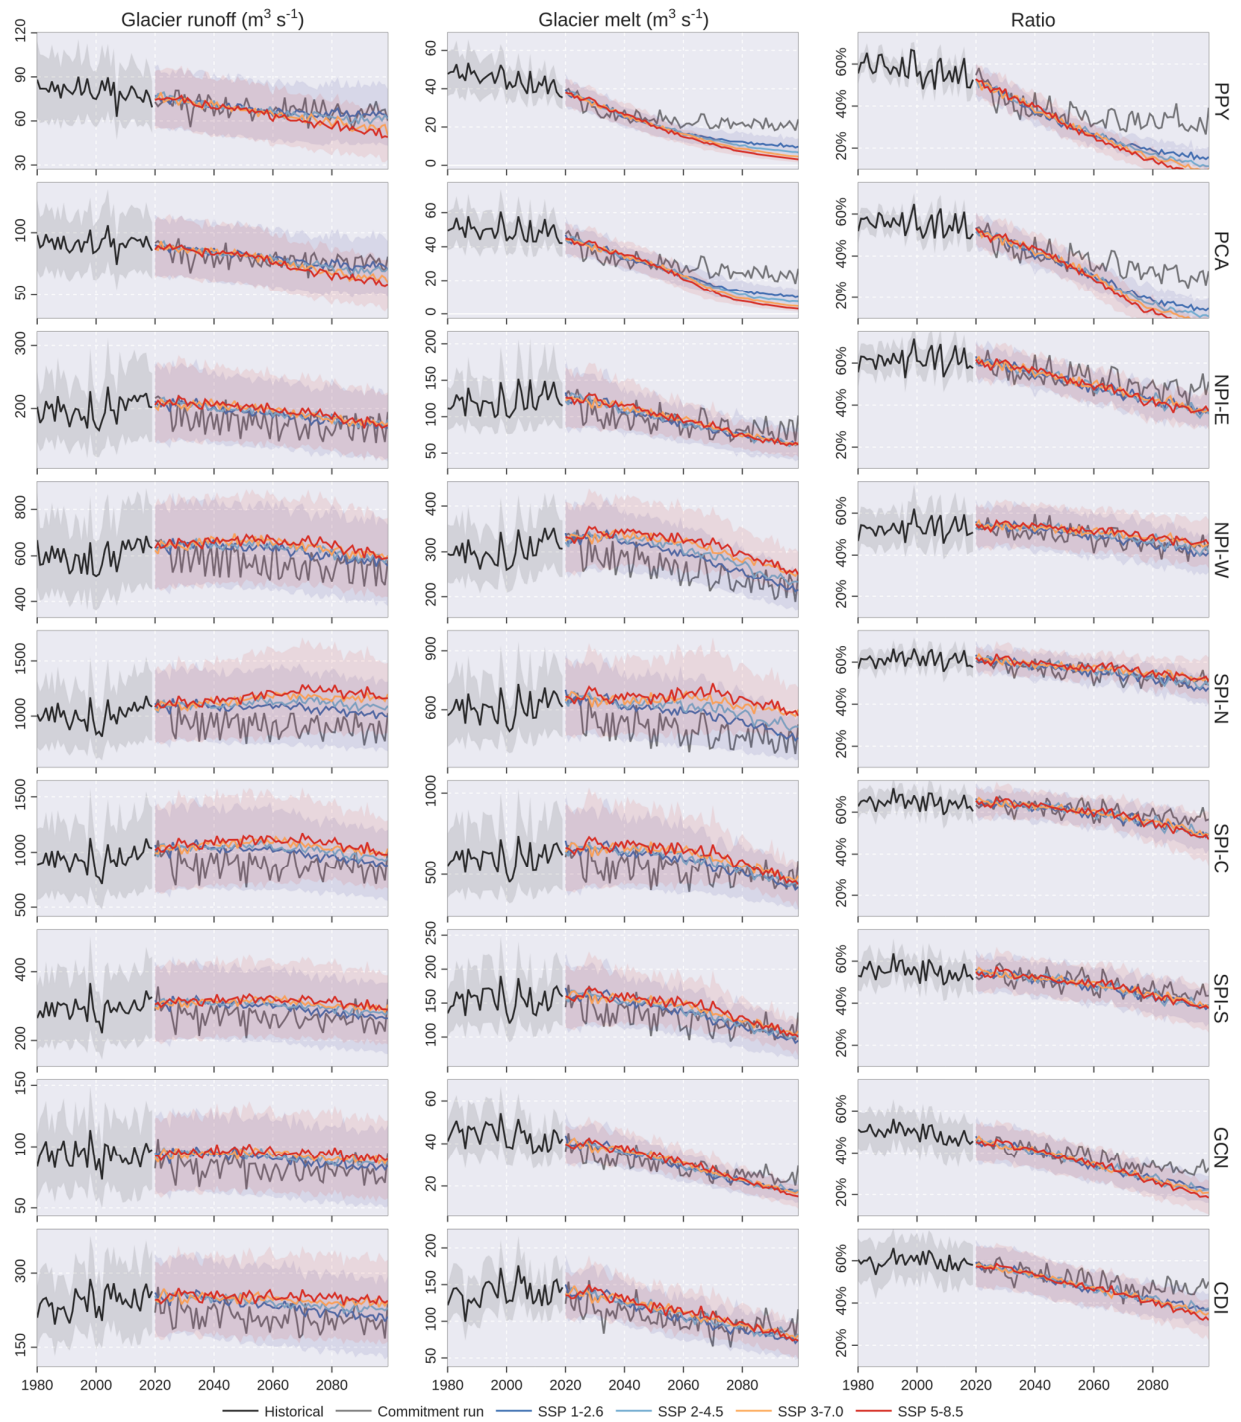

20 **Figure S2. Total runoff, melt on glacier, and the ratio of both variables. The solid line represents the mean for each scenario, while the uncertainty bands represent  $\pm$  one standard deviation (shown only for historical, SSP 1-2.6 and SSP 5-8.5 for visualization purposes). Note that each panel has a different scale.**

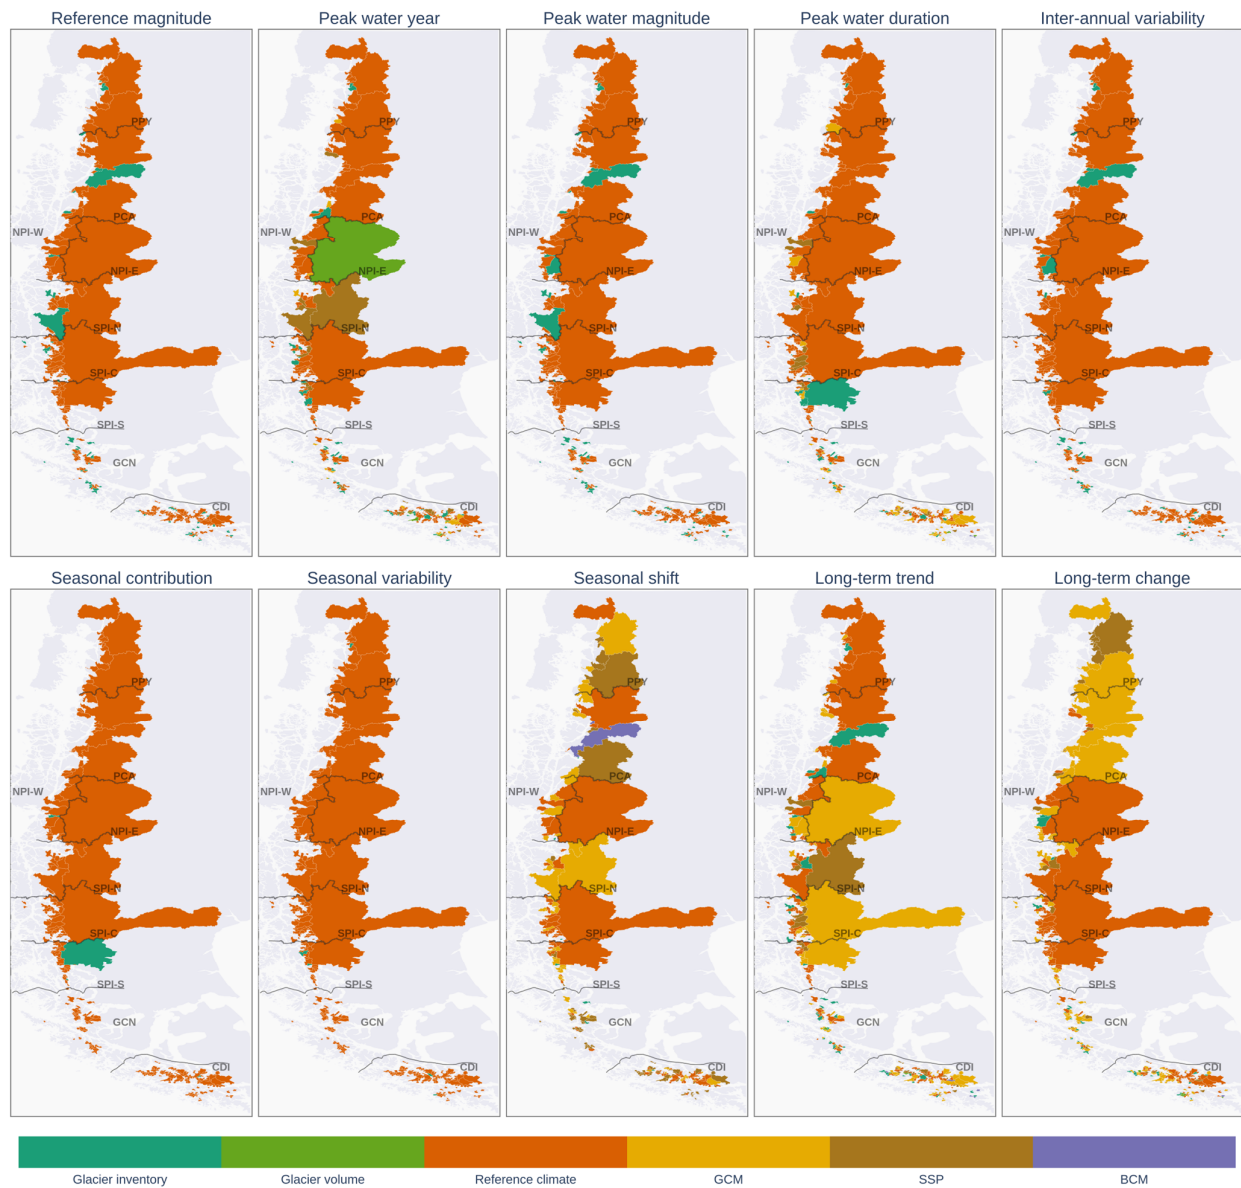

25 **Figure S3. Largest source of uncertainty for each catchment and hydrological signature based on glacier melt (Table 2). The importance of each source was calculated as the percentage of the average change in the Root Mean Square Error (RMSE).**

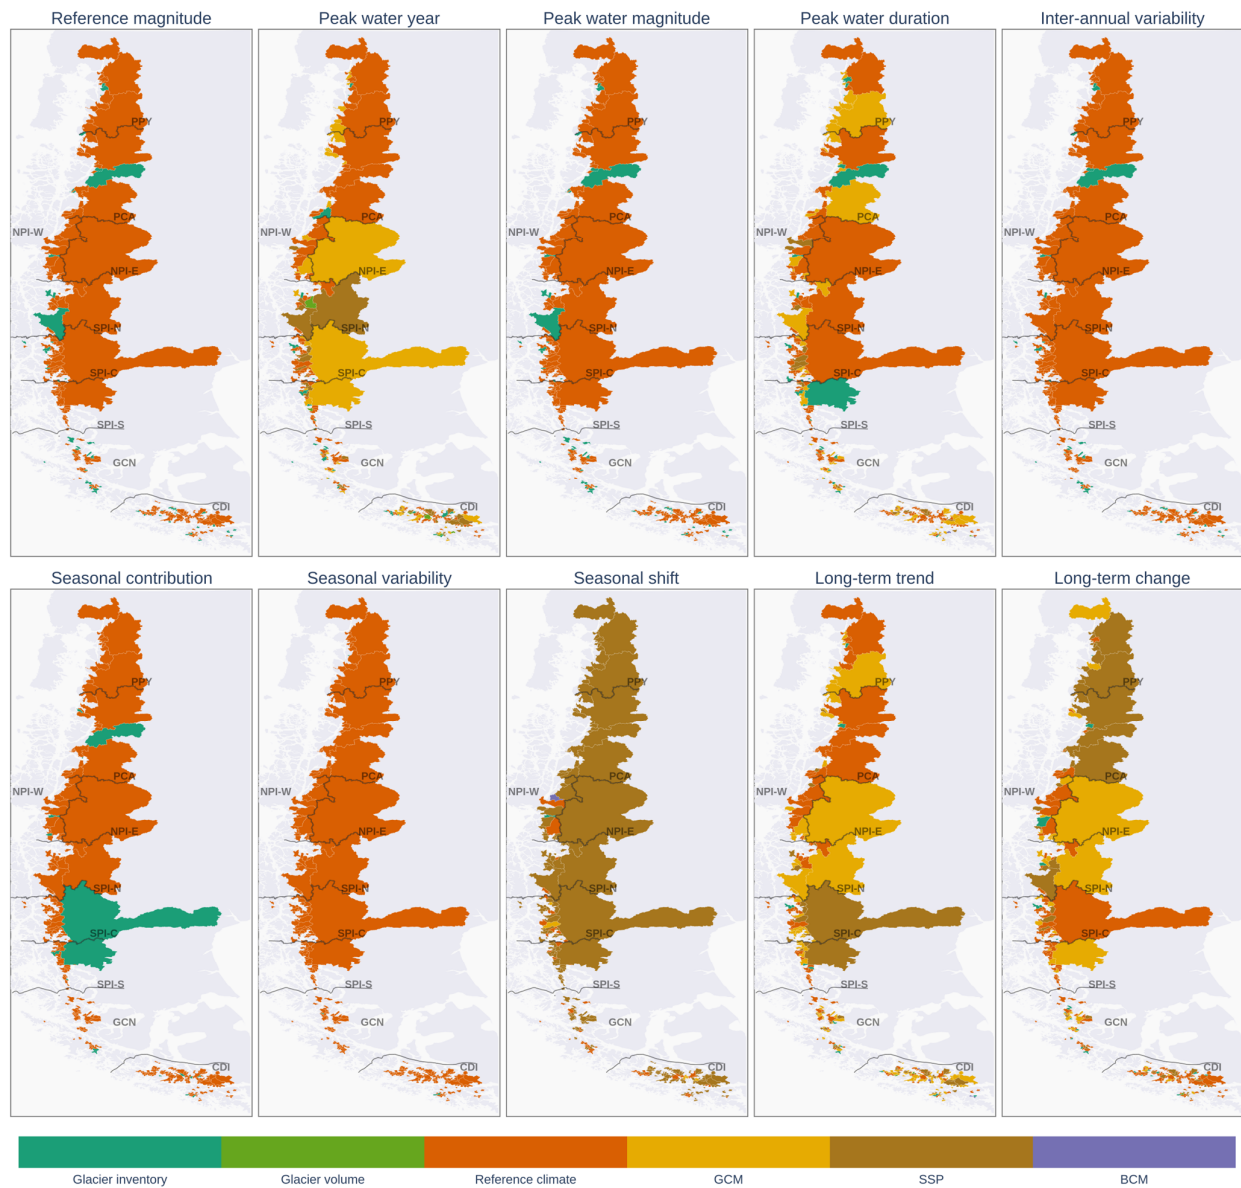

30 **Figure S4.** Largest source of uncertainty for each catchment and hydrological signature based on total glacier runoff (Table 2). The importance of each source was calculated as the percentage of the average change in the Root Mean Square Error (RMSE).

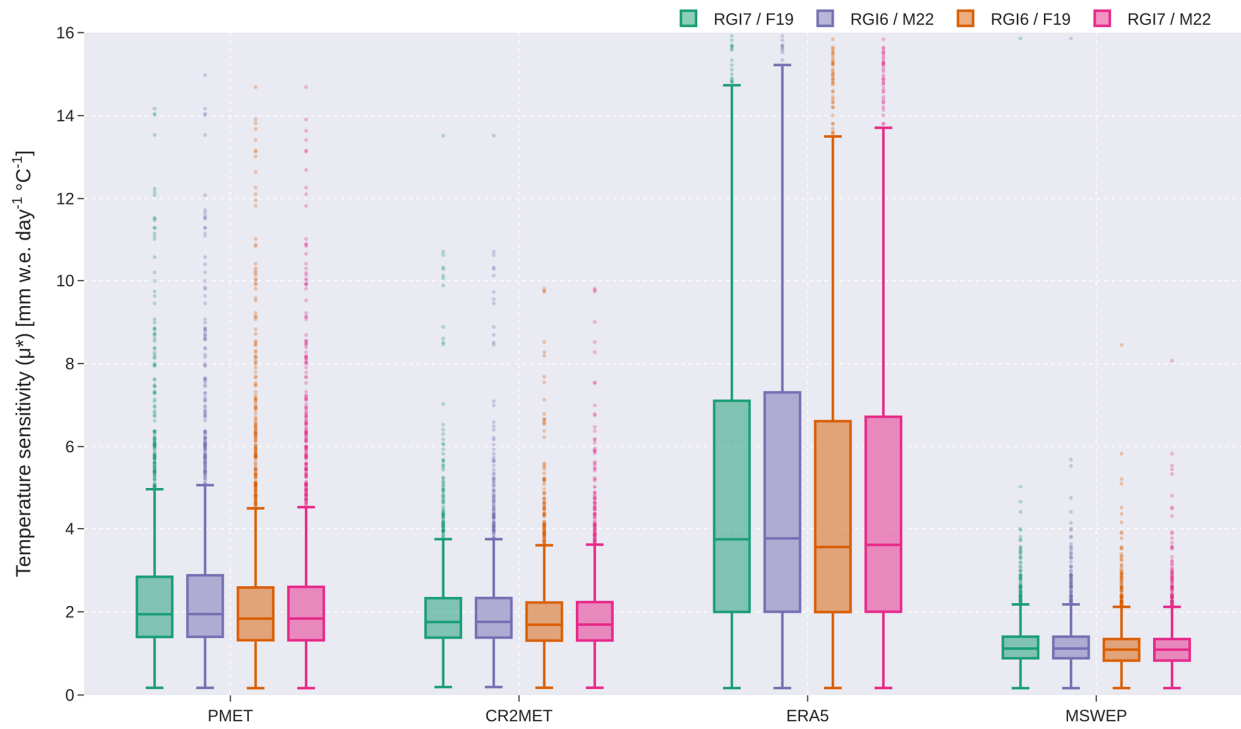

35 **Figure S5. Temperature sensitivity for each historical scenario (n = 16). The historical conditions involved in the calibration process considered the geometry obtained from the glacier inventories (RGI6 and 7), the volume obtained from ice thickness datasets (F19 and M22), and the reference climate dataset (PMET, CR2MET, MSWEP and ERA5). More details on the historical conditions can be found in Section 3.2.1. Each boxplot aggregates all simulated glaciers (glacier area > 1 km<sup>2</sup>), corresponding to 2,034 and 1,837 glaciers for RGI6 and RGI7, respectively.**



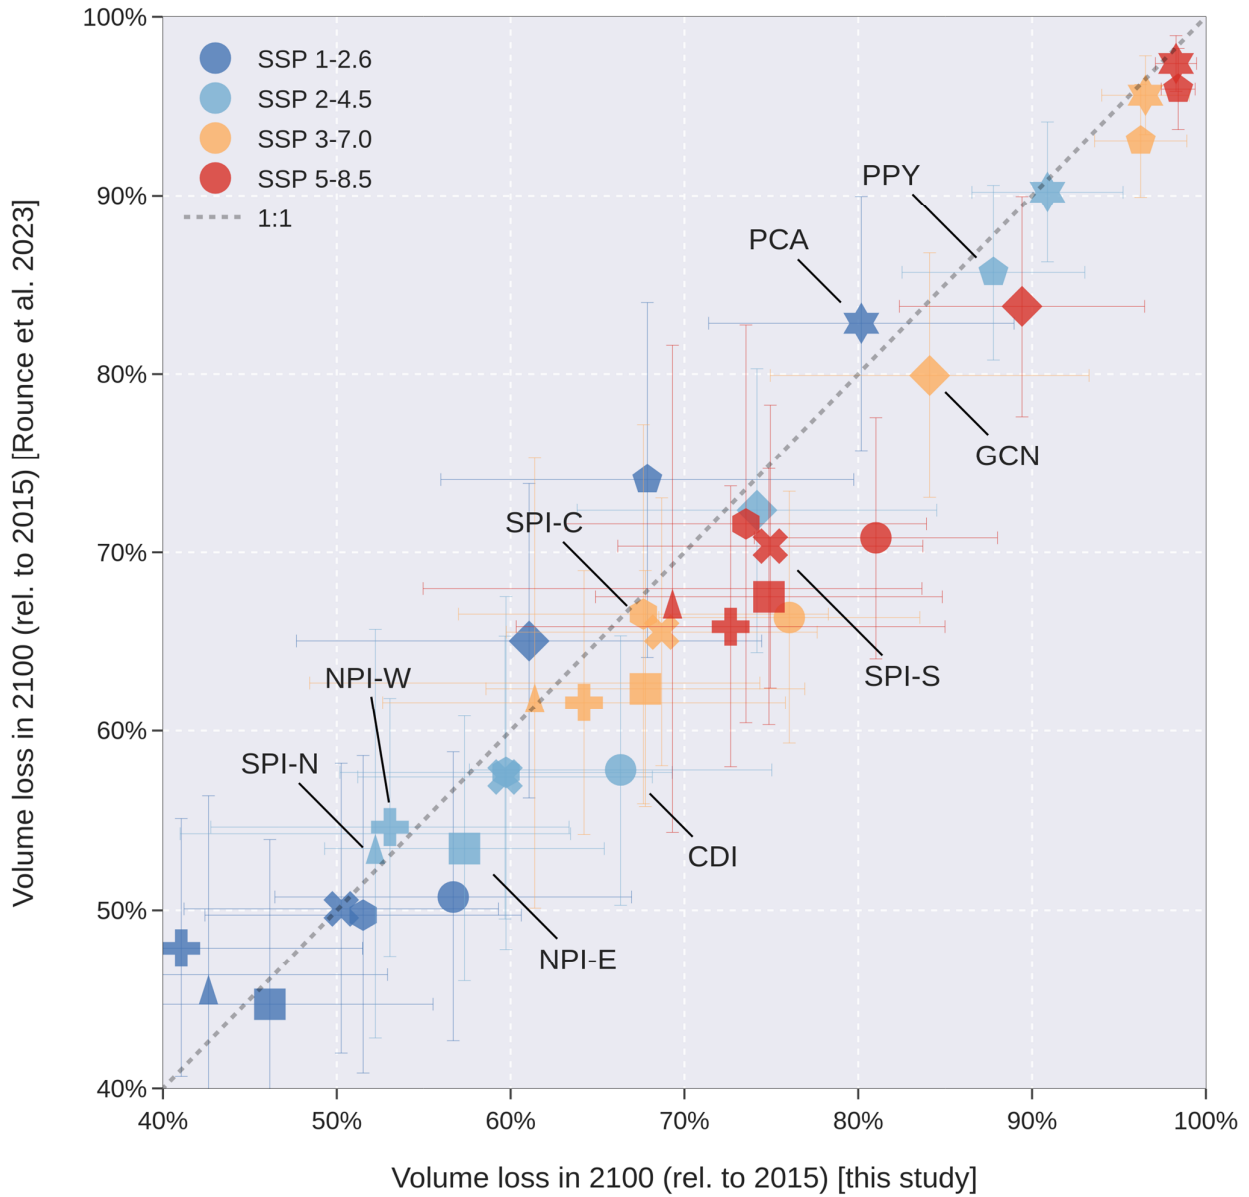

40 **Figure S6. Projected mean mass loss in 2100 (rel. to 2015) compared to Rounce et al. (2023).** Each symbol represents a different hydrological zone, and each colour indicates a different emission scenario. The errors bars are calculated using one standard deviation ( $n = 480$  per SSP). Note that Rounce et al. (2023) used PyGEM, and ERA5 as the reference climate.
